EXPRESSION OF CONCERN

# Expression of Concern: Determinants of change in timely first antenatal booking among pregnant women in Ethiopia: A decomposition analysis

The *PLOS One* Editors

The *PLOS One* Editors issue an Expression of Concern to alert readers that this article [1] was identified as one of a series of submissions for which we have concerns about authorship and adherence to the journal's first and second publication criteria. We regret that these issues were not addressed prior to the article's publication.

## Reference

1. Yalew M, Adane B, Damtie Y, Kefale B, Dewau R, Mektu K, et al. Determinants of change in timely first antenatal booking among pregnant women in Ethiopia: A decomposition analysis. *PLoS One*. 2021;16(6):e0251847. <https://doi.org/10.1371/journal.pone.0251847> PMID: [34086688](https://pubmed.ncbi.nlm.nih.gov/34086688/)

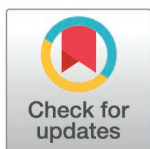

## OPEN ACCESS

**Citation:** The *PLOS One* Editors (2025) Expression of Concern: Determinants of change in timely first antenatal booking among pregnant women in Ethiopia: A decomposition analysis. *PLoS One* 20(7): e0329128. <https://doi.org/10.1371/journal.pone.0329128>

**Published:** July 29, 2025

**Copyright:** © 2025 The *PLOS One* Editors. This is an open access article distributed under the terms of the [Creative Commons Attribution License](https://creativecommons.org/licenses/by/4.0/), which permits unrestricted use, distribution, and reproduction in any medium, provided the original author and source are credited.
